# Supplementary material
Source: PubMed Central journal article supplement (PMC3278241)
Supplement: supp_111.026328_ajcn026328-SF1.pdf [file supp_111.026328_ajcn026328-SF1.pdf]

de Souza et al., Supplementary material to accompany "Macronutrients and body composition changes"

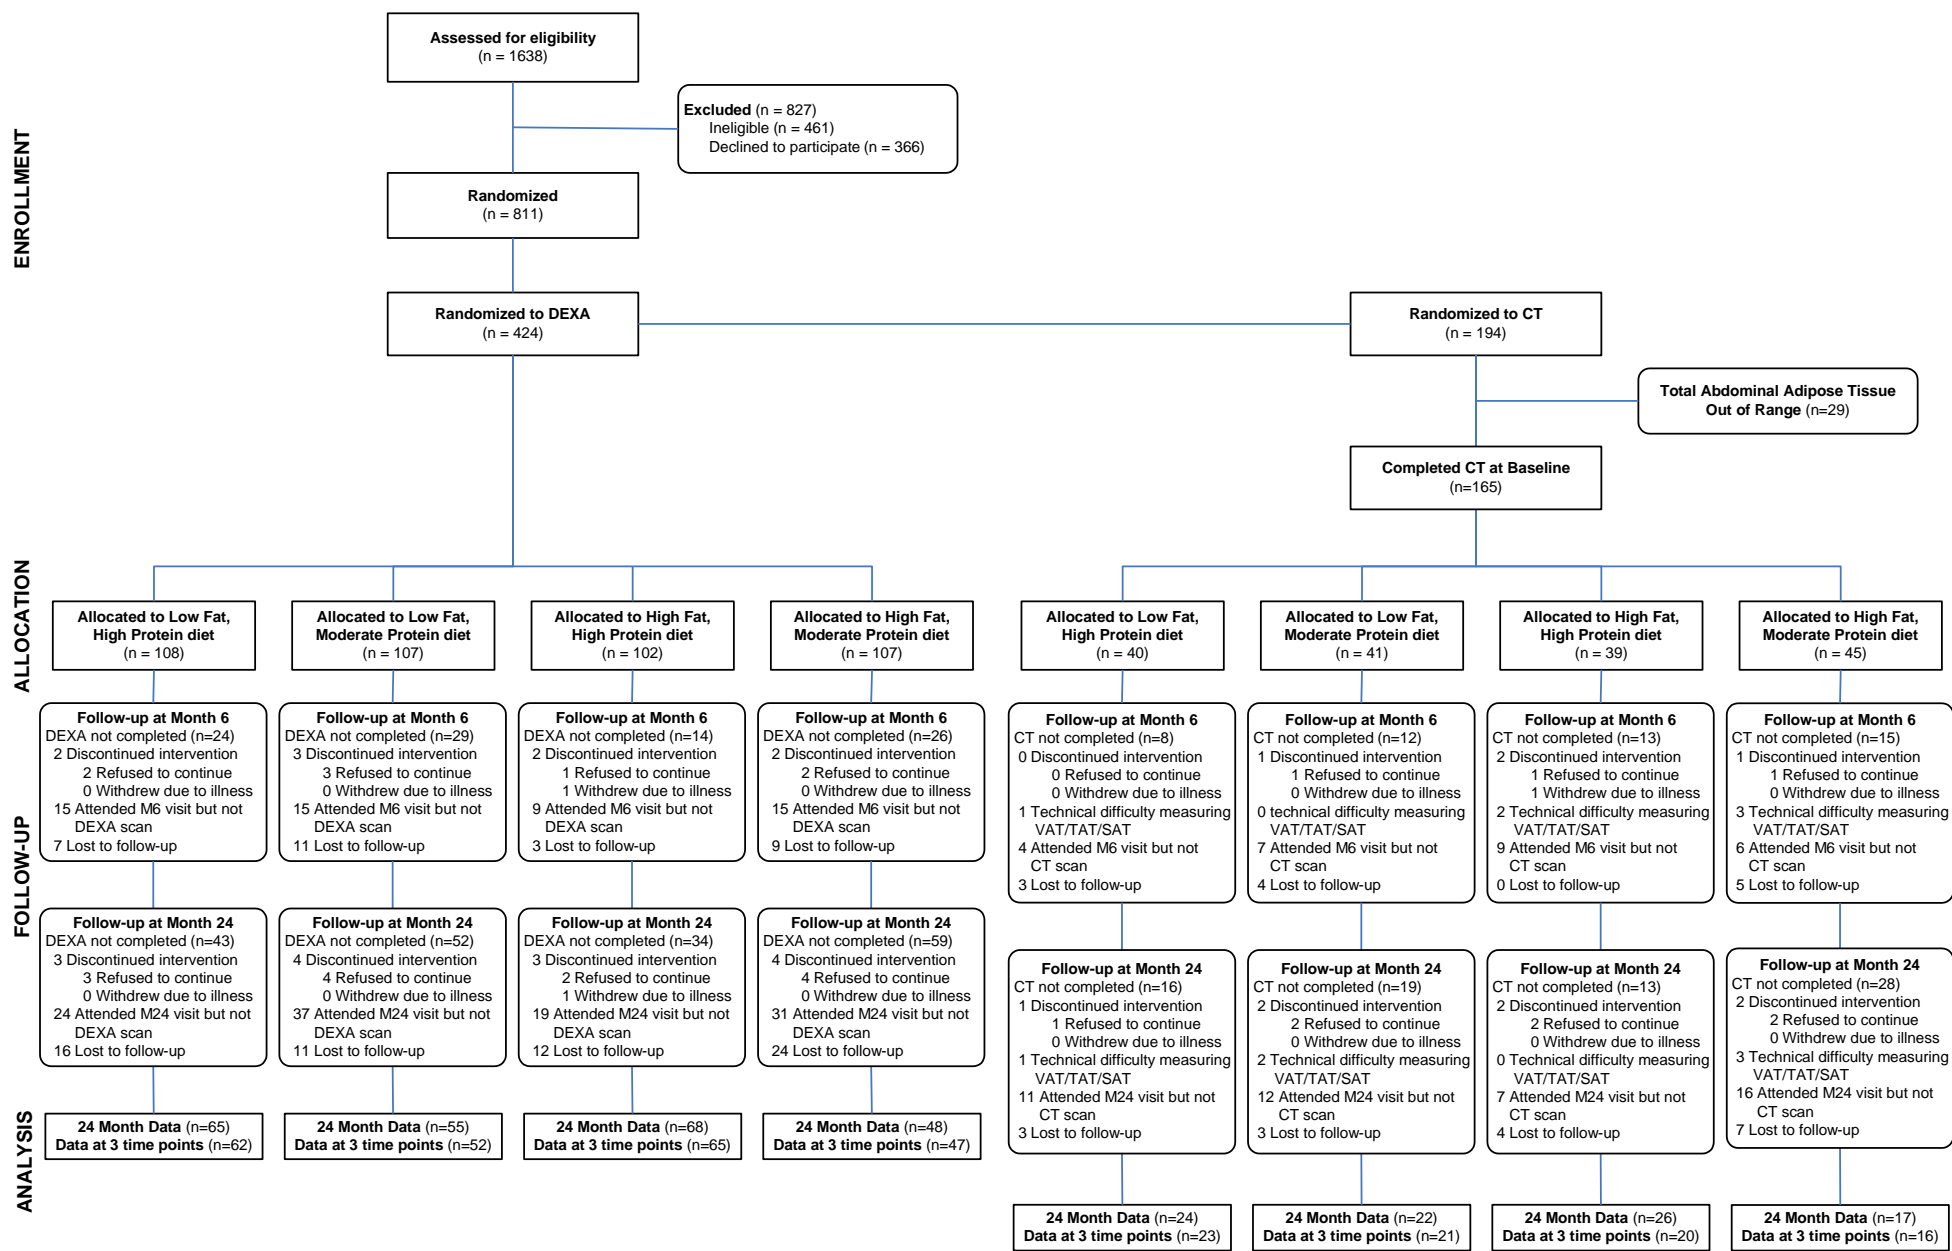

Figure S1

**Figure S1. *Participant flow for those randomly selected to receive dual x-ray absorptiometry scans (n=424) and those selected to receive computed tomography scan (n=194) at baseline.***

A total of 331 participants (78%; 153 men and 178 women) provided DXA measurements at both baseline and 6 months, and 236 (58%; 107 men and 129 women) at 2 years. One hundred and seventeen participants (71%; 58 men and 59 women) repeated complete CT measurements at 6 months, and 89 (54%; 39 men and 50 women) at 2 years. A total of 226 participants (53%; 122 women and 104 men) provided DXA and 80 (41%; 43 women and 37 men) provided complete CT on all three measurement occasions.

## **ON-LINE SUPPLEMENT 1: ALLOMETRIC MODELING**

Hallgreen and Hall (1) proposed that changes in visceral fat and fat mass during weight loss were related according to the equation:

$$\Delta VAT/\Delta FM = k \frac{VAT(kg)}{FM(kg)},$$

where  $k$  is a dimensionless constant, when both visceral fat and fat mass change in the same direction. They found that across all interventions, and in both genders,  $k = 1.3 \pm 0.1$ . To test if  $k$  was a good fit to our data, the primary outcome variable was the coefficient ( $k$ ) of the ratio of change in visceral fat to the change in total fat from baseline to 6 months or 2 years ( $\Delta VAT$  (kg)/ $\Delta FM$  (kg)); dependent variable) regressed on baseline visceral fat to total fat ratio (visceral fat /fat mass; independent variable). We have previously found the standard deviation of repeated VAT measurements to be  $\approx 0.2$  kg, and with  $k=1.3$ , a 3 kg change in fat mass would be necessary to overcome this imprecision. Given that 60-70% of body weight change is fat mass, this translates to a 5 kg total weight change. For these analyses, we therefore included any participant who provided a measurement of both fat mass and visceral fat at each time point, and lost 5 kg body weight, with losses of both visceral fat and body fat ( $n=101$  at 6 months;  $n=58$  at 2 years). Regression diagnostics indicated the presence of nine influential outliers at 6 months and three at 2 years (Cook's distance<sub>critical</sub>>0.0396). The overall  $r^2$  did increase when these outliers were removed, however the estimates of  $k$  and their standard errors did not change substantially. We therefore included these 12 data points to provide the most robust estimate of  $k$ . To determine  $k$ , we fit the regression model:

$$\Delta VAT (kg)/\Delta FM (kg)_{0 \text{ to } 6 \text{ months or } 2 \text{ years}} = \alpha + k \times \frac{VAT(kg)}{FM(kg)},$$

using simple linear regression with a no-intercept model ( $\alpha=0$ ), since a positive intercept would imply visceral fat could decrease even if initial visceral fat were 0. To test the difference in  $k$  across diets or between genders, we created an indicator variable,  $i$ , for macronutrient level or gender (where  $i=1$  for "high" and  $i=0$  for "low/average"; or 1 for "male" and 0 for "female"), and the interaction term,  $i \times \frac{VAT(kg)}{FM(kg)}$ . We then entered terms for  $i$ ,  $\frac{VAT(kg)}{FM(kg)}$ , and their interaction into the regression model, and tested the null hypothesis that  $k_{\text{high}} = k_{\text{low/average}}$  or  $k_{\text{male}} = k_{\text{female}}$  (i.e. the  $\beta$ -coefficient for the interaction term = 0). We present the overall  $k$  across all diets, and pre-planned contrasts as above to facilitate comparisons with previous literature on this topic.

1. Hallgreen CE, Hall KD. Allometric relationship between changes of visceral fat and total fat mass. *Int J Obes (Lond)* 2008;32:845-52.

**ON-LINE SUPPLEMENT 2: COMPLETERS-ONLY ANALYSES**

| DXA Measurement                 | Completers at 6 months<br>(n=331) |                 |      | Completers at 6 months<br>and 2 years<br>(n=226) |                 |       |
|---------------------------------|-----------------------------------|-----------------|------|--------------------------------------------------|-----------------|-------|
|                                 | High Protein                      | Average Protein | P    | High Protein                                     | Average Protein | P     |
| Weight (kg)                     | -7.4±0.4                          | -7.5±0.4        | 0.87 | -7.9±0.5                                         | -8.8±0.5        | 0.22  |
| Fat mass (kg)                   | -5.3±0.3                          | -5.0±0.3        | 0.49 | -5.7±0.4                                         | -5.9±0.4        | 0.70  |
| Lean Mass (kg)                  | -2.1±0.2                          | -2.5±0.2        | 0.06 | -2.2±0.2                                         | -2.9±0.2        | <0.01 |
| CT Measurement                  | Completers at 6 months<br>(n=117) |                 |      | Completers at 6 months<br>and 2 years<br>(n=80)  |                 |       |
|                                 | High Protein                      | Average Protein | P    | High Protein                                     | Average Protein | P     |
| Total Abdominal Fat (kg)        | -3.1±0.3                          | -3.6±0.19       | 0.19 | -3.4±0.4                                         | -4.0±0.4        | 0.22  |
| Visceral Abdominal Fat (kg)     | -1.2±0.2                          | -1.3±0.2        | 0.92 | -1.4±0.2                                         | -1.5±0.2        | 0.83  |
| Subcutaneous Abdominal Fat (kg) | -1.8±0.2                          | -2.3±0.2        | 0.04 | -2.0±0.3                                         | -2.6±0.3        | 0.08  |
|                                 | Completers at 6 months<br>(n=147) |                 |      | Completers at 6 months<br>and 2 years<br>(n=106) |                 |       |
|                                 | High Protein                      | Average Protein | P    | High Protein                                     | Average Protein | P     |
| Hepatic Density (HU)            | 4.47±0.64                         | 4.23±0.67       | 0.79 | 5.58±0.78                                        | 5.12±0.83       | 0.68  |

**Supplemental Table 1.** Effect of dietary protein level on changes in body composition at 6 months in those who completed all measurements at 6 months, and in those who would go on to complete all 3 visits for study outcomes. Data expressed as mean ± SEM change using GLM ANOVA models including main effect of diet, with baseline, age, gender and site as covariates. P-values assess the statistical significance of the difference between the change on High (25%) and Average (15%) Protein diet assignment. Increases in hepatic density reflect decreases in hepatic fat content.

| DXA Measurement                 | Completers at 6 months<br>(n=331) |            |      | Completers at 6 months<br>and 2 years<br>(n=226) |            |      |
|---------------------------------|-----------------------------------|------------|------|--------------------------------------------------|------------|------|
|                                 | High<br>Fat                       | Low<br>Fat | P    | High<br>Fat                                      | Low<br>Fat | P    |
| Weight (kg)                     | -7.1±0.4                          | -7.7±0.4   | 0.35 | -8.1±0.5                                         | -8.5±0.5   | 0.61 |
| Fat mass (kg)                   | -4.9±0.3                          | -5.3±0.3   | 0.32 | -5.6±0.4                                         | -5.9±0.4   | 0.62 |
| Lean Mass (kg)                  | -2.2±0.2                          | -2.3±0.2   | 0.58 | -2.5±0.2                                         | -2.6±0.2   | 0.69 |
| CT Measurement                  | Completers at 6 months<br>(n=117) |            |      | Completers at 6 months<br>and 2 years<br>(n=80)  |            |      |
|                                 | High<br>Fat                       | Low<br>Fat | P    | High<br>Fat                                      | Low<br>Fat | P    |
| Total Abdominal Fat (kg)        | -3.1±0.3                          | -3.6±0.3   | 0.27 | -3.6±0.4                                         | -3.8±0.4   | 0.70 |
| Visceral Abdominal Fat (kg)     | -1.1±0.2                          | -1.4±0.2   | 0.18 | -1.3±0.2                                         | -1.6±0.2   | 0.29 |
| Subcutaneous Abdominal Fat (kg) | -2.0±0.2                          | -2.1±0.2   | 0.59 | -2.3±0.3                                         | -2.3±0.3   | 0.87 |
|                                 | Completers at 6 months<br>(n=147) |            |      | Completers at 6 months<br>and 2 years<br>(n=106) |            |      |
|                                 | High<br>Fat                       | Low<br>Fat | P    | High<br>Fat                                      | Low<br>Fat | P    |
| Hepatic Density (HU)            | 4.30±0.63                         | 4.60±0.67  | 0.74 | 5.56±0.79                                        | 5.43±0.79  | 0.91 |

**Supplemental Table 2. Effect of dietary fat level on weight and body composition change at 6 months** in those who completed all measurements at 6 months, and those who would go on to complete all 3 visits for study outcomes. Data expressed as mean ± SEM change using GLM ANOVA models including main effect of diet, with baseline, age, gender and site as covariates. P-values assess the statistical significance of the difference between the change on High (40%) and Low (20%) Fat diet assignment. Increases in hepatic density reflect decreases in hepatic fat content.

| DXA Measurement                 | Completers at 6 months<br>(n=166) |                |      | Completers at 6 months<br>and 2 years<br>(n=117) |                |      |
|---------------------------------|-----------------------------------|----------------|------|--------------------------------------------------|----------------|------|
|                                 | Highest<br>Carb                   | Lowest<br>Carb | P    | Highest<br>Carb                                  | Lowest<br>Carb | P    |
| Weight (kg)                     | -7.6±0.6                          | -7.0±0.5       | 0.44 | -8.6±0.7                                         | -7.5±0.6       | 0.25 |
| Fat mass (kg)                   | -5.1±0.4                          | -4.9±0.4       | 0.85 | -5.6±0.4                                         | -5.3±0.4       | 0.63 |
| Lean Mass (kg)                  | -2.5±0.2                          | -2.1±0.2       | 0.09 | -2.9±1.9                                         | -2.2±0.3       | 0.04 |
| CT Measurement                  | Completers at 6 months<br>(n=55)  |                |      | Completers at 6 months<br>and 2 years<br>(n=41)  |                |      |
|                                 | Highest<br>Carb                   | Lowest<br>Carb | P    | Highest<br>Carb                                  | Lowest<br>Carb | P    |
| Total Abdominal Fat (kg)        | -3.5±0.4                          | -2.6±0.4       | 0.11 | -3.8±0.6                                         | -3.0±0.5       | 0.29 |
| Visceral Abdominal Fat (kg)     | -1.2±0.2                          | -0.9±0.2       | 0.23 | -1.3±0.2                                         | -1.1±0.2       | 0.32 |
| Subcutaneous Abdominal Fat (kg) | -2.3±0.3                          | -1.7±0.3       | 0.10 | -2.4±0.4                                         | -1.9±0.4       | 0.32 |
|                                 | Completers at 6 months<br>(n=72)  |                |      | Completers at 6 months<br>and 2 years<br>(n=54)  |                |      |
|                                 | Highest<br>Carb                   | Lowest<br>Carb | P    | Highest<br>Carb                                  | Lowest<br>Carb | P    |
| Hepatic Density (HU)            | 3.84±0.81                         | 3.46±0.73      | 0.73 | 4.37±0.99                                        | 4.53±0.90      | 0.90 |

**Supplemental Table 3. Effect of dietary carbohydrate level on weight and body composition change at 6 months** in those who completed all measurements at 6 months, and in those who would go on to complete all 3 visits for study outcomes. Data expressed as mean ± SEM change using GLM ANOVA models including main effect of diet, with baseline, age, gender and site as covariates. P-values assess the statistical significance of the difference between the change on Highest Carbohydrate (65%) and Lowest (35%) Carbohydrate diet assignment. Increases in hepatic density reflect decreases in hepatic fat content.

| DXA Measurement                    | Completers at 2 years<br>(n=236) |                    |      | Completers at 6 months<br>and 2 years<br>(n=226) |                    |      |
|------------------------------------|----------------------------------|--------------------|------|--------------------------------------------------|--------------------|------|
|                                    | High<br>Protein                  | Average<br>Protein | P    | High<br>Protein                                  | Average<br>Protein | P    |
| Weight (kg)                        | -6.1±0.7                         | -6.3±0.8           | 0.87 | -6.3±0.7                                         | -6.4±0.8           | 0.91 |
| Fat mass (kg)                      | -4.1±0.5                         | -4.0±0.5           | 0.90 | -4.2±0.5                                         | -4.1±0.6           | 0.87 |
| Lean Mass (kg)                     | -2.0±0.2                         | -2.3±0.3           | 0.48 | -2.1±0.2                                         | -2.3±0.3           | 0.51 |
| CT Measurement                     | Completers at 2 years<br>(n=89)  |                    |      | Completers at 6 months<br>and 2 years<br>(n=80)  |                    |      |
|                                    | High<br>Protein                  | Average<br>Protein | P    | High<br>Protein                                  | Average<br>Protein | P    |
| Total Abdominal Fat (kg)           | -2.2±0.5                         | -2.9±0.5           | 0.33 | -2.5±0.5                                         | -3.1±0.6           | 0.39 |
| Visceral Abdominal Fat (kg)        | -1.0±0.2                         | -1.2±0.2           | 0.43 | -1.1±0.2                                         | -1.3±0.3           | 0.50 |
| Subcutaneous Abdominal Fat<br>(kg) | -1.3±0.3                         | -1.7±0.3           | 0.31 | -1.4±0.3                                         | -1.8±0.3           | 0.36 |
|                                    | Completers at 2 years<br>(n=112) |                    |      | Completers at 6 months<br>and 2 years<br>(n=106) |                    |      |
|                                    | High<br>Protein                  | Average<br>Protein | P    | High<br>Protein                                  | Average<br>Protein | P    |
| Hepatic Density (HU)               | 3.56±1.13                        | 4.58±1.22          | 0.52 | 4.14±1.20                                        | 4.73±1.26          | 0.72 |

**Supplemental Table 4.** Effect of dietary protein level on weight and body composition change at 2 years in those who completed all measurements at 2 years, and in those who completed all 3 visits for study outcomes. Data expressed as mean ± SEM change using GLM ANOVA models including main effect of diet, with baseline, age, gender and site as covariates. P-values assess the statistical significance of the difference between the change on High (25%) and Average (15%) protein diet assignment. Increases in hepatic density reflect decreases in hepatic fat content.

| DXA Measurement                 | Completers at 2 years<br>(n=236) |            |      | Completers at 6 months<br>and 2 years<br>(n=226) |            |      |
|---------------------------------|----------------------------------|------------|------|--------------------------------------------------|------------|------|
|                                 | High<br>Fat                      | Low<br>Fat | P    | High<br>Fat                                      | Low<br>Fat | P    |
| Weight (kg)                     | -5.8±0.7                         | -6.6±0.7   | 0.43 | -6.0±0.7                                         | -6.6±0.7   | 0.53 |
| Fat mass (kg)                   | -3.7±0.5                         | -4.3±0.5   | 0.43 | -3.9±0.5                                         | -4.4±0.5   | 0.53 |
| Lean Mass (kg)                  | -2.0±0.3                         | -2.3±0.3   | 0.52 | -2.1±0.3                                         | -2.3±0.3   | 0.61 |
| CT Measurement                  | Completers at 2 years<br>(n=89)  |            |      | Completers at 6 months<br>and 2 years<br>(n=80)  |            |      |
|                                 | High<br>Fat                      | Low<br>Fat | P    | High<br>Fat                                      | Low<br>Fat | P    |
| Total Abdominal Fat (kg)        | -2.4±0.5                         | -2.7±0.5   | 0.70 | -2.5±0.5                                         | -3.1±0.6   | 0.39 |
| Visceral Abdominal Fat (kg)     | -0.9±0.2                         | -1.3±0.2   | 0.24 | -1.0±0.2                                         | -1.4±0.2   | 0.14 |
| Subcutaneous Abdominal Fat (kg) | -1.5±0.3                         | -1.4±0.3   | 0.83 | -1.5±0.3                                         | -1.6±0.3   | 0.75 |
|                                 | Completers at 2 years<br>(n=112) |            |      | Completers at 6 months<br>and 2 years<br>(n=106) |            |      |
|                                 | High<br>Fat                      | Low<br>Fat | P    | High<br>Fat                                      | Low<br>Fat | P    |
| Hepatic Density (HU)            | 3.54±1.15                        | 4.83±1.18  | 0.43 | 4.13±1.21                                        | 4.95±1.23  | 0.62 |

**Supplemental Table 5. Effect of dietary fat level on weight and body composition change at 2 years** in those who completed all measurements at 2 years, and in those who completed all 3 study visits. Data expressed as mean ± SEM change using GLM ANOVA models including main effect of diet, with baseline, age, gender and site as covariates. P-values assess the statistical significance of the difference between the change on High (40%) and Low (20%) Fat diet assignment. Increases in hepatic density reflect decreases in hepatic fat content.



| DXA Measurement                 | Completers at 2 years<br>(n=166) |                |      | Completers at 6 months<br>and 2 years<br>(n=117) |                |      |
|---------------------------------|----------------------------------|----------------|------|--------------------------------------------------|----------------|------|
|                                 | Highest<br>Carb                  | Lowest<br>Carb | P    | Highest<br>Carb                                  | Lowest<br>Carb | P    |
| Weight (kg)                     | -5.7±1.0                         | -5.0±0.9       | 0.68 | -5.5±0.9                                         | -5.2±1.0       | 0.79 |
| Fat mass (kg)                   | -3.4±0.6                         | -3.2±0.7       | 0.81 | -3.4±0.7                                         | -3.3±0.6       | 0.94 |
| Lean Mass (kg)                  | -2.1±0.4                         | -1.8±0.3       | 0.51 | -2.1±0.3                                         | -1.8±0.4       | 0.58 |
| CT Measurement                  | Completers at 2 years<br>(n=48)  |                |      | Completers at 6 months<br>and 2 years<br>(n=41)  |                |      |
|                                 | Highest<br>Carb                  | Lowest<br>Carb | P    | Highest<br>Carb                                  | Lowest<br>Carb | P    |
| Total Abdominal Fat (kg)        | -2.5±0.6                         | -1.8±0.7       | 0.42 | -2.8±0.8                                         | -1.7±0.7       | 0.27 |
| Visceral Abdominal Fat (kg)     | -1.1±0.2                         | -0.6±0.2       | 0.22 | -1.2±0.3                                         | -0.6±0.3       | 0.13 |
| Subcutaneous Abdominal Fat (kg) | -1.4±0.5                         | -1.1±0.4       | 0.62 | -1.6±0.5                                         | -1.1±0.5       | 0.43 |
|                                 | Completers at 2 years<br>(n=61)  |                |      | Completers at 6 months<br>and 2 years<br>(n=54)  |                |      |
|                                 | Highest<br>Carb                  | Lowest<br>Carb | P    | Highest<br>Carb                                  | Lowest<br>Carb | P    |
| Hepatic Density (HU)            | 1.69±1.53                        | 0.71±1.36      | 0.63 | 1.49±1.65                                        | 1.35±1.50      | 0.95 |

**Supplemental Table 6. Effect of dietary carbohydrate level on weight and body composition change at 2 years** in those who completed all measurements at 6 months, and in those who completed all 3 study visits. Data expressed as mean ± SEM change using GLM ANOVA models including main effect of diet, with baseline, age, gender and site as covariates. P-values assess the statistical significance of the difference between the change on Highest Carbohydrate (65%) and Lowest (35%) Carbohydrate diet assignment. Increases in hepatic density reflect decreases in hepatic fat content.
